# Supplementary material
Source: ML conference proceedings conference paper supplement (https://openreview.net/forum?id=nkaba3ND7B5)
Supplement: supplementary_material [file attachment]

## A APPENDIX

### A.1 GOAL-CONDITIONED ARL

This framework can be readily extended to goal-conditioned reinforcement learning (Kaelbling 1993; Schaul et al., 2015), which is also an area of study covered in some prior works on reset-free reinforcement learning (Sharma et al., 2021). Assuming a goal space  $\mathcal{G}$  and task-distribution  $p_g : \mathcal{G} \mapsto \mathbb{R}_{\geq 0}$ , assume that the algorithm  $\mathbb{A} : \{s_i, a_i, s_{i+1}\}_{i=0}^{t-1} \mapsto (a_t, \pi_t)$ , where  $a_t \in \mathcal{A}$  and  $\pi_t : \mathcal{S} \times \mathcal{A} \times \mathcal{G} \mapsto \mathbb{R}_{\geq 0}$ . Equation 1 can be redefined as follows:

$$J_D(\pi) = \mathbb{E}_{g \sim p_g, s_0 \sim \rho, a_t \sim \pi(\cdot | s_t, g), s_{t+1} \sim p(\cdot | s_t, a_t)} \left[ \sum_{t=0}^{\infty} \gamma^t r(s_t, a_t, g) \right] \quad (3)$$

Additionally, we will assume that the algorithm has access to a set of samples  $g_i \sim p(g)$  from the goal distribution. The definitions for deployed policy evaluation and continuing policy evaluation remains the same.

### A.2 RELATING PRIOR WORKS TO ARL

In this section, we connect the settings in prior works to our proposed autonomous reinforcement learning formalism. First, consider the typical reinforcement learning approach: Algorithm  $\mathbb{A}$  assigns the rewards to transitions using  $r(s, a)$ , learns a policy  $\pi$  and outputs  $\pi_t = \pi$  and  $a_t \sim \pi$  (possibly adding noise to the action). The algorithm exclusively optimizes the reward function  $r$  throughout training.

Reconsider the door closing example: the agent needs to practice closing the door repeatedly, which requires opening the door repeatedly. However, if we optimize  $\pi$  to maximize  $r$  over its lifetime, it will never be incentivized to open the door to practice closing it again. In theory, assuming an ergodic MDP and that the exploratory actions have support over all actions, the agent will open the door given enough time, and the agent will practice closing it again. However, in practice, this can be quite an inefficient strategy to rely on and thus, prior reset-free reinforcement learning algorithms consider other strategies for exploration. To understand current work, we introduce the notion of a surrogate reward function  $\tilde{r}_t : \mathcal{S} \times \mathcal{A} \mapsto \mathbb{R}$ . At every time step  $t$ ,  $\mathbb{A}$  outputs  $a_t \sim \pi_e$  and  $\pi_t$  for evaluation, where  $\pi_e$  optimizes  $\tilde{r}_t$  over the transitions seen till time  $t - 1$ <sup>3</sup>. Prior works on reset-free reinforcement learning can be encapsulated within this framework as different choices for surrogate reward function  $\tilde{r}_t$ . Some pertinent examples: Assuming  $r_\rho$  is some reward function designed that shifts the agent’s state distribution towards initial state distribution  $\rho$ , alternating  $\tilde{r}_t = r$  and  $\tilde{r}_t = r_\rho$  for a fixed number of environment steps recovers the forward-backward reinforcement learning algorithms proposed by Han et al. (2015); Eysenbach et al. (2017). Similarly, R3L (Zhu et al., 2020) can be understood as alternating between a perturbation controller optimizing a state novelty reward and the forward controller optimizing the task reward  $r$ . Recent work on using multi-task learning for reset-free reinforcement learning (Gupta et al., 2021) can be understood as choosing  $\tilde{r}_t(s_t, a_t) = \sum_{k=1}^K r_k(s_t, a_t) \mathbb{I}[s_t \in \mathcal{S}_k]$  such that  $\mathcal{S}_1, \dots, \mathcal{S}_K$  is a partition of the state space  $\mathcal{S}$  and only reward function  $r_k$  is active in the subset  $\mathcal{S}_k$ . Assuming the goal-conditioned autonomous reinforcement learning framework, the recently proposed algorithm VaPRL (Sharma et al., 2021) can be understood as creating a curriculum of goals  $g_t$  such that at every step, the action  $a_t \sim \pi(\cdot | s_t, g_t)$ . The curriculum simplifies the task for the agent, bootstrapping on the success of easier tasks to efficiently improve  $J_D(\pi)$ .

### A.3 ENVIRONMENT DESCRIPTIONS AND REWARD FUNCTIONS

**Tabletop-Organization.** The Tabletop-Organization task is a diagnostics object manipulation task proposed by (Sharma et al., 2021). The observation space is a 12 dimensional vector consisting of the object position, gripper position, gripper state, and the current goal. The action space is 3-D action that consists of a 2-D position delta and gripper torque. The reward function is a sparse indicator function,  $r(s, g) = \mathbb{I}(\|s - g\|_2 \leq 0.2)$ . The agent is provided with 12 forward and 12 backward demonstrations.

**Sawyer-Door.** The Sawyer Door environment consists of a Sawyer robot with a 14 dimension observation space consisting of 3-D effector position, 3-D door position, gripper state and desired

<sup>3</sup>This can also be captured in a multi-task reinforcement learning framework, where  $\pi_e, \pi_t$  are the same policy with different task variables as input.

goal. The action space is a 4 dimension action space that consisting of a 3-D end effector control and normalized gripper torque. Let  $s_d$  be dimensions of the observation corresponding to the door state, and  $g$  be the corresponding goal. The reward function is a sparse indicator function  $r(s, g) = \mathbb{1}(\|s_d - g\|_2 \leq 0.08)$ . The agent is provided with a 5 forward and 5 backward demos.

**Sawyer-Peg.** The Sawyer-Peg environment shares observation and action space as the Sawyer-Door environment. Let  $s_p$  be the state of the peg and  $g$  be the corresponding goal. The reward function is a sparse indicator function  $r(s, g) = \mathbb{1}(\|s - g\|_2 \leq 0.05)$ . The agent is provided with 10 forward and 10 backward demonstrations for this task.

**Franka-Kitchen.** The Franka-Kitchen environment consists of a 9-DoF Franka robot with an array of objects (microwave, two distinct burner, door) represented by a 14 dimensional vector. The reward function is composed of a dense reward that is a sum of the euclidean distance between the goal position of the arm and the current state plus shaped reward per object as described in [Gupta et al. \(2019\)](#). No demonstrations are provided for this task.

**DHand-LightBulb.** The DHand is a 4 fingered robot (16-DoF) mounted on a 6-DoF Sawyer Arm. Let  $x, y$  be the current position of the object,  $x_{goal}, y_{goal}$  be the corresponding goal, and  $z$  by the objects euler angle. The reward function for this task is the following.

$$\begin{aligned}
 R_{bulb} = & - \left\| \begin{bmatrix} x \\ y \end{bmatrix} - \begin{bmatrix} x_{goal} \\ y_{goal} \end{bmatrix} \right\| - 2 \cdot (|z - z_{goal}|) + \\
 & \mathbb{I} \left\{ \left\| \begin{bmatrix} x \\ y \end{bmatrix} - \begin{bmatrix} x_{goal} \\ y_{goal} \end{bmatrix} \right\| < 0.1 \right\} \\
 & + \\
 & 10(\mathbb{I} \left\{ \left\| \begin{bmatrix} x \\ y \end{bmatrix} - \begin{bmatrix} x_{goal} \\ y_{goal} \end{bmatrix} \right\| < 0.1 \text{ AND } |z - z_{goal}| < 0.1 \right\}) - \\
 & \mathbb{I} \left\{ z < \text{threshold} \right\}
 \end{aligned}$$

The observation space of the DHand consists of a 30 dimensional observation and corresponding goal state. The observation is composed of a 16 dimensional hand position, 7 dimensional arm position, 3 dimension object position, 3 dimensional euler angle and a 6 dimensional vector representing the dimensional wise distance to between objects in the environment. The action space is a position delta over the combined 22 DoF of the robot.

**Minitaur-Pen.** The Minitaur pen’s observation space is the joint positions of its 8 links, their corresponding velocity, current torque, quaternion of its base position, and goal location in the pen. The action space is a 8 dimensional PD target. Let  $s_b$  be the 2-D position of the agent, and  $g$  be the corresponding goal. Let  $s_t$  be the current torques on the agent, and  $s_v$  be their velocities. The reward for the agent is a dense reward  $r(s, a) = -2.0 \cdot \|s_b - g\| + 0.02 \cdot \|s_v \cdot s_t\|$ . We do not provide any demonstrations for this task.

#### A.4 ALGORITHMS

We use soft actor-critic [Haarnoja et al. \(2018b\)](#) as the base algorithm for our experiments in this paper. When available, the demonstrations are added to the replay buffer at the beginning of training.

| Hyperparameter              | Value                          |
|-----------------------------|--------------------------------|
| Actor-critic architecture   | fully connected(256, 256)      |
| Nonlinearity                | ReLU                           |
| RND architecture            | fully connected(256, 256, 512) |
| RND Gamma                   | 0.99                           |
| Optimizer                   | Adam                           |
| Learning rate               | 3e-4                           |
| $\gamma$                    | 0.99                           |
| Target update $\tau$        | 0.005                          |
| Target update period        | 1                              |
| Batch size                  | 256                            |
| Classifier batch size       | 128                            |
| Initial collect steps       | $10^3$                         |
| Collect steps per iteration | 1                              |
| Reward scale                | 1                              |
| Min log std                 | -20                            |
| Max log std                 | 2                              |

Table 3: Shared algorithm parameters.

| Environment           | Training Horizon ( $H_T$ ) | Evaluation Horizon ( $H_E$ ) | Replay Buffer Capacity |
|-----------------------|----------------------------|------------------------------|------------------------|
| Tabletop-Organization | 200,000                    | 200                          | 20,000,000             |
| Sawyer-Door           | 200,000                    | 300                          | 20,000,000             |
| Sawyer-Peg            | 100,000                    | 200                          | 20,000,000             |
| Franka-Kitchen        | 100,000                    | 400                          | 10,000,000             |
| DHand-Lightbulb       | 400,000                    | 400                          | 10,000,000             |
| Minitaur-Pen          | 100,000                    | 1000                         | 10,000,000             |

Table 4: Environment specific parameters.

#### A.5 EVALUATION CURVES

In this section, we plot the detailed deployment policy evaluation and continuing policy evaluation curves for different algorithms and different environments:

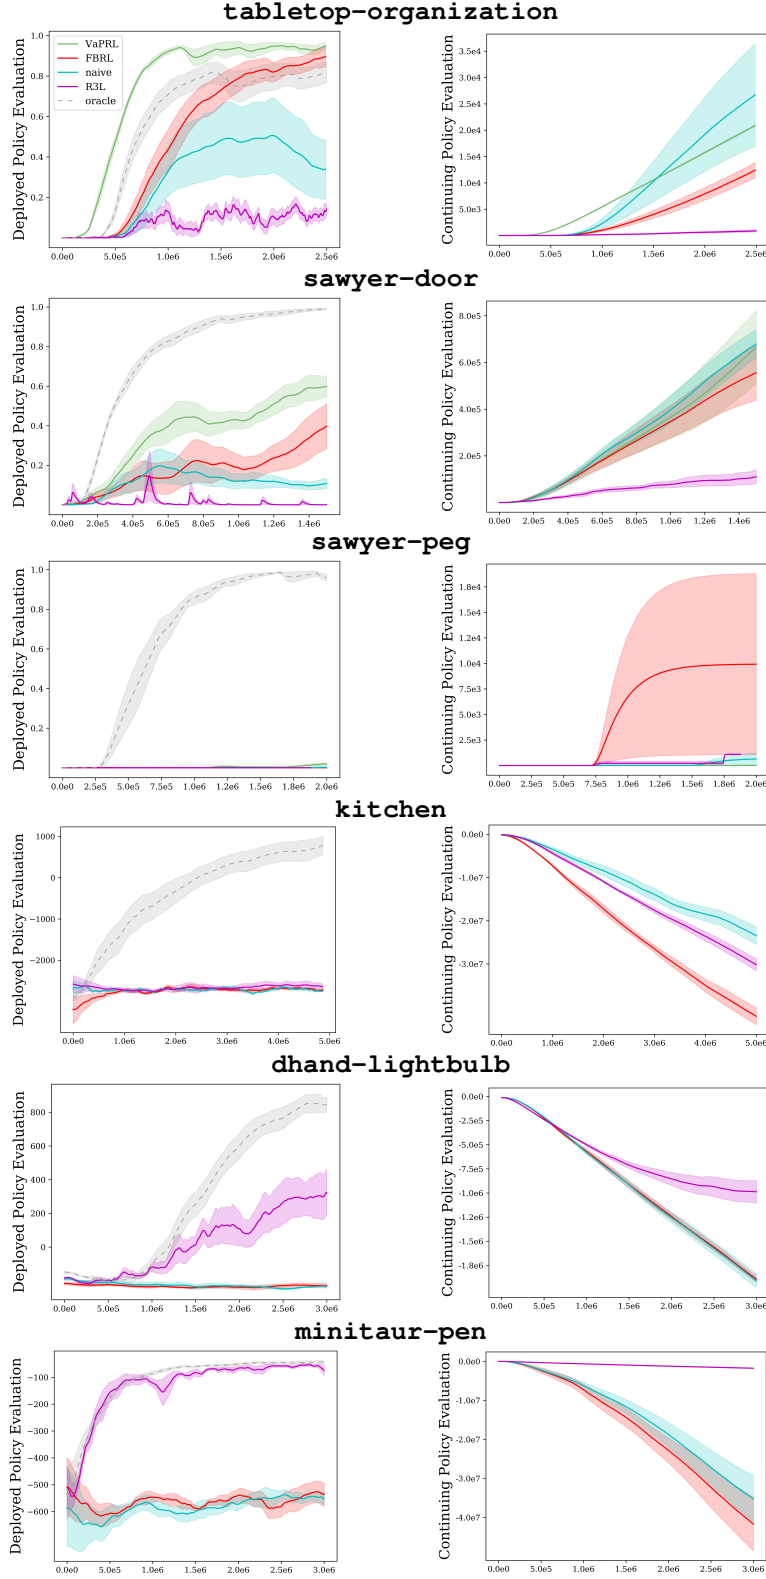

Figure 5: Deployed Policy Evaluation and Continuing Policy Evaluation per environment. Results and averaged over 5 seeds. Shaded regions denote 95% confidence bounds.
